# Supplementary material
Source: publisher figshare collection journal article supplement (https://frontiersin.figshare.com/ndownloader/files/24012437)
Supplement: Supplementary file [file 24012437]

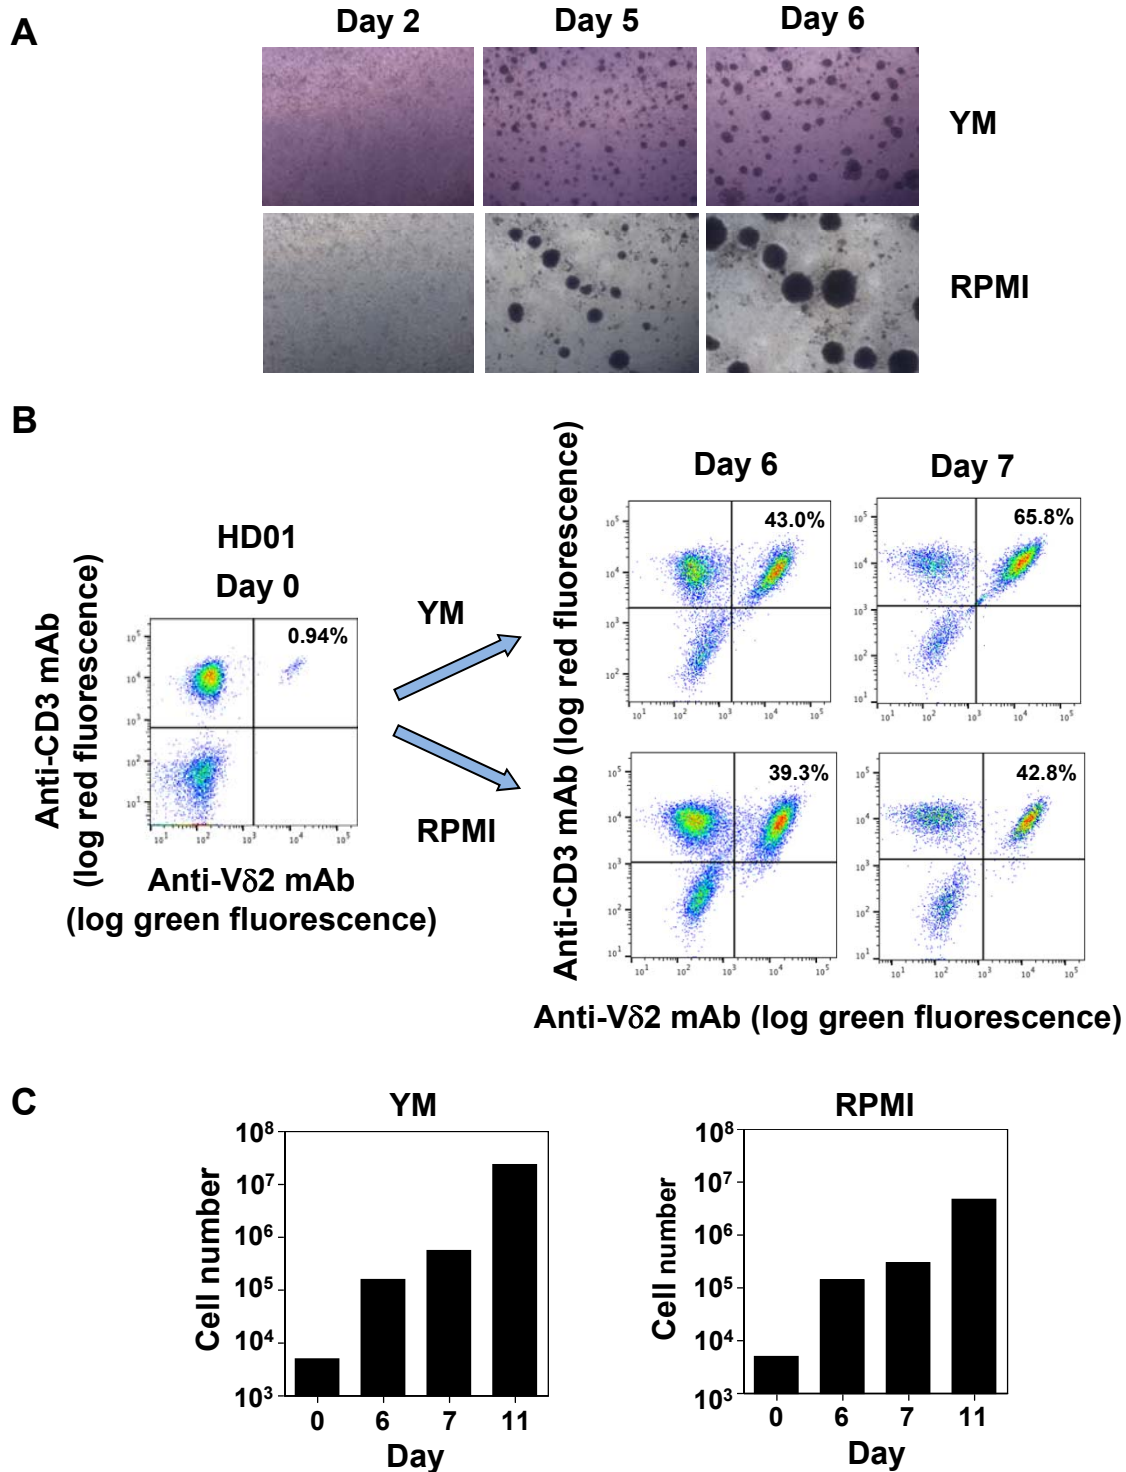

**Supplementary Fig. 1. Effect of culture media on the expansion of V $\gamma$ 2V $\delta$ 2 T cells. (A) Microscopic images of PBMC stimulated with ZOL.** PBMC derived from a healthy donor (HD1) was stimulated with 5  $\mu$ M of ZOL in either Yssel's medium or RPMI1640 medium. Cell clustering was observed under a microscope on days 2, 5, and 6. **(B) Flow cytometric analysis of V $\gamma$ 2V $\delta$ 2 T cells stimulated with ZOL.** Cultured cells in (A) were stained with PE-conjugated anti-CD3 mAb and FITC-conjugated anti-V $\delta$ 2 mAb on days 0, 6, and 7 and analyzed using a FACS Verse flow cytometer. **(C) Effect of culture media on the proliferation of V $\gamma$ 2V $\delta$ 2 T cells.** After stimulation with ZOL in (A), the number of V $\gamma$ 2V $\delta$ 2 T cells was calculated based on the cell number and flow cytometric analysis.

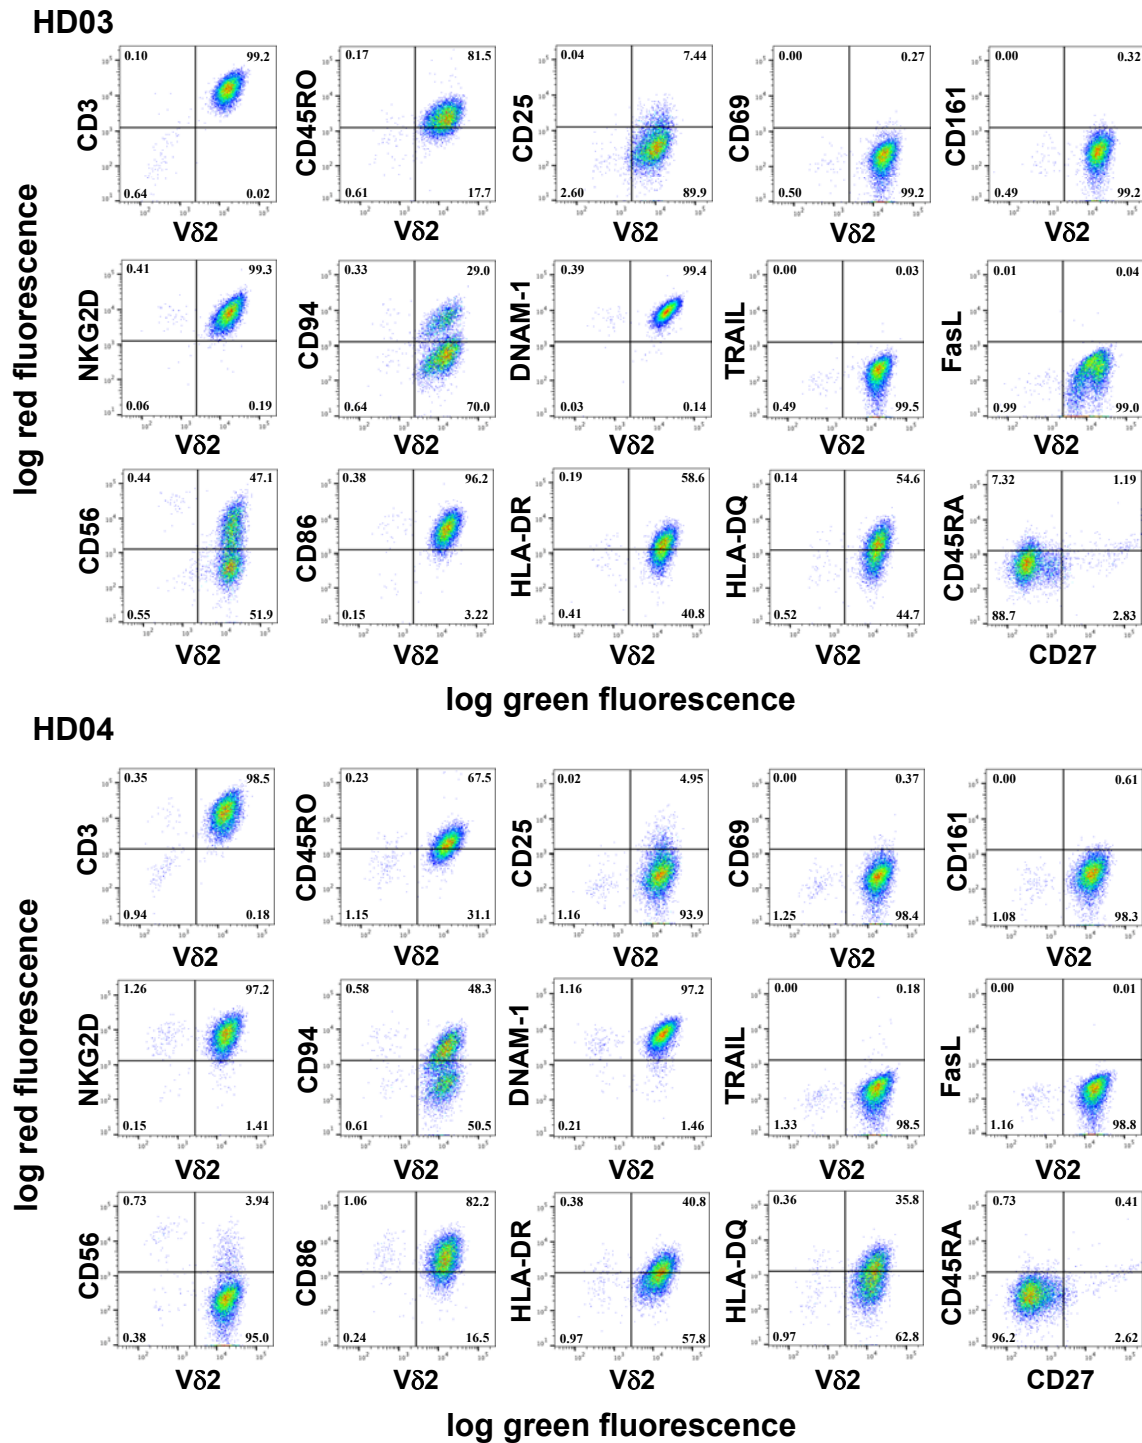

**Supplementary Fig. 2. Phenotypic analysis of  $V\gamma 2V\delta 2$  T cells expanded with PTA.** PBMC derived from two healthy donors (HD03 and HD04) were stimulated with 1  $\mu$ M of PTA in Yssel's medium supplemented with human AB serum and  $V\gamma 2V\delta 2$  T cells were expanded in the presence of IL-2 for 11 days. The cells were stained with PE-conjugated anti-CD3, CD45RO, CD25, CD69, CD161, NKG2D, DNAM-1, CD94, TRAIL, FasL, CD56, CD86, HLA-DR, HLA-DQ, or CD45RA mAb and FITC-conjugated anti- $V\delta 2$  or CD27 mAb.

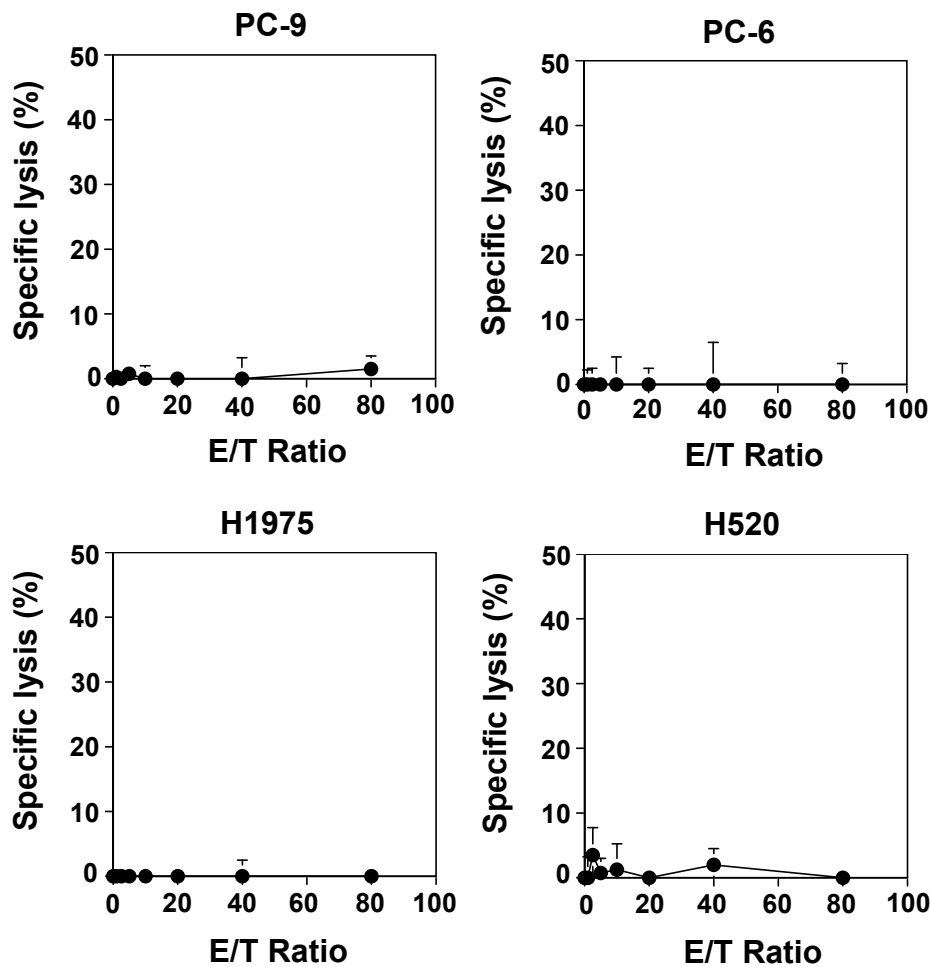

**Supplementary Fig. 3. V $\gamma$ 2V $\delta$ 2 T cells failed to kill human lung cancer cell lines in 40 min.** PC-9, PC-6, H1975, and H520 human lung cancer cell lines ( $1 \times 10^6$  cells/ml) in 15 ml conical tubes were pulsed with 2.5  $\mu$ l of BM-HT at 37°C with 5% CO<sub>2</sub> for 15 min. To the conical tubes was added 5 ml each of the complete RPMI140 medium and the tubes were centrifuged at 600 x g at 4°C for 5 min. After the supernatants were removed, the cell pellets were dispersed by tapping and resuspended in 5 ml of the complete RPMI1640 medium. The cells were washed two more times and resuspended in 20 ml of the complete RPMI1640 medium. The tumor cell suspensions ( $5 \times 10^3$  cells/100  $\mu$ l) were dispensed into a 96-well round bottom plate, to which were added 100  $\mu$ l of PTA-expanded V $\gamma$ 2V $\delta$ 2 T cells at effector-to-target ratios of 0:1, 1.25:1, 2.5:1, 5:1, 10:1, 20:1, 40:1, and 80:1. The plate was centrifuged at 200 x g at ambient temperature for 2 min and then incubated at 37°C with 5% CO<sub>2</sub> for 40 min. Detergent was added to wells for the determination of the maximum release. After the cell suspensions were mixed, the plate was centrifuged at 600 x g for 2 min and the supernatants (25  $\mu$ l each) were removed to a new 96-well round bottom plate containing 250  $\mu$ l of Eu solution. After the solution was mixed, 200  $\mu$ l samples were transferred to a 96-well optical plate (Thermo Fisher Scientific Inc.). Time-resolved fluorescence was measured through an ARVO multi-plate reader (PerkinElmer Inc., Waltham, MA). All measurements were performed in triplicate. Specific lysis (%) was calculated as  $100 \times [\text{experimental release (counts)} - \text{spontaneous release (counts)}] / [\text{maximum release (counts)} - \text{spontaneous release (counts)}]$ .

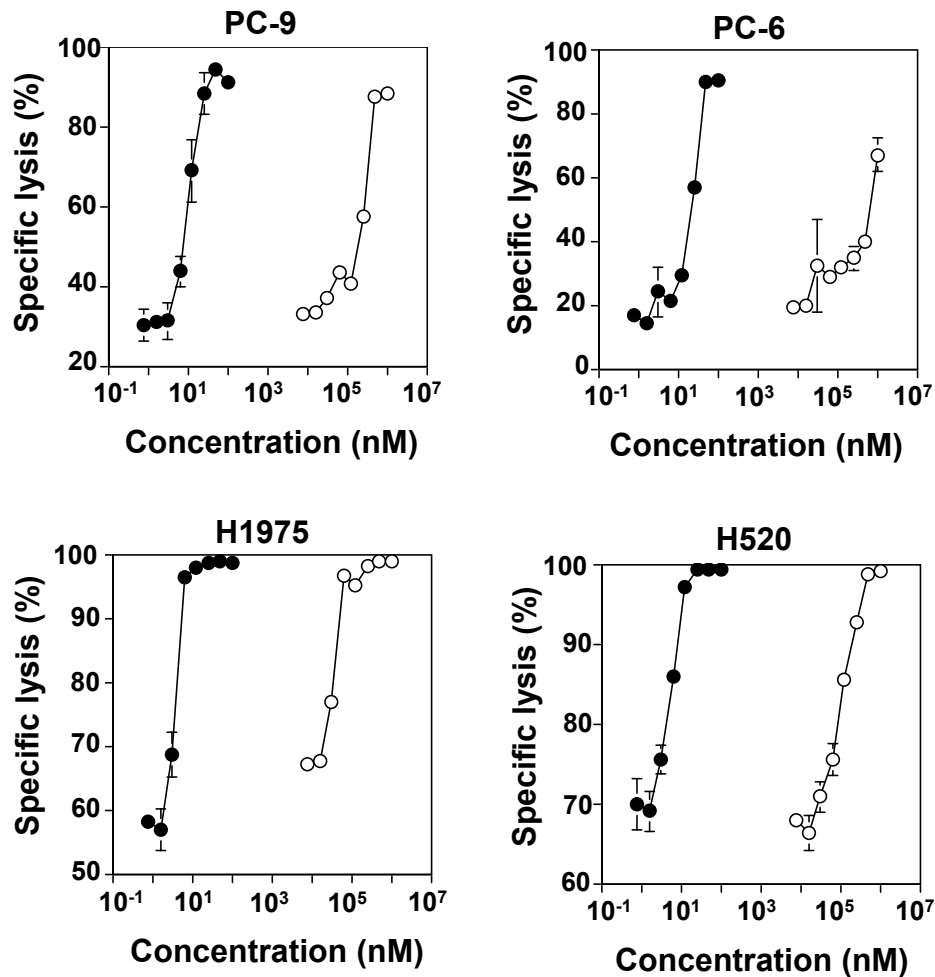

**Supplementary Fig. 4. Comparison of PTA and ZOL in the sensitization of human lung cancer cells for Vγ2Vδ2 T cells.** PC-9, PD-6, H1975, and H520 human lung cancer cells ( $2 \times 10^4$  cells/200  $\mu$ l) were dispensed into a 96-well flat bottom plate, which was incubated at 37°C with 5% CO<sub>2</sub> for 16 h. After the culture supernatants were aspirated, 200  $\mu$ l of a serially-diluted PTA (●) was added to each well in triplicate at concentrations of 0.78125 nM, 1.5625 nM, 3.125 nM, 6.25 nM, 12.5 nM, 25 nM, 50 nM, or 100 nM, or a serially-diluted ZOL (○) at final concentrations of 7.8125  $\mu$ M, 15.625  $\mu$ M, 31.25  $\mu$ M, 62.5  $\mu$ M, 125  $\mu$ M, 250  $\mu$ M, 500  $\mu$ M, or 1000  $\mu$ M. The plate was incubated at 37°C with 5% CO<sub>2</sub> for 2 h. After the supernatants were aspirated, 200  $\mu$ l of PTA-expanded Vγ2Vδ2 T cells ( $3 \times 10^5$  cells) were added to each well. The plate was incubated at 37°C with 5% CO<sub>2</sub> for 16 h. Then, the culture supernatants were aspirated and the wells were gently washed three times with 200  $\mu$ l of the complete RPMI1640 medium. To the wells was added 100  $\mu$ l each of CellTiterGlo Reagent, and the cell lysates were transferred into a 96-well optiplate. Luminescence was measured through an ARVO multi-plate reader (PerkinElmer Inc.).
